# Supplementary material for: Structural Elucidation of Glycosaminoglycans in the Tissue of Flounder and Isolation of Chondroitin Sulfate C
Source: MDPI journal article supplement (doi:10.3390/md22050198), 2024-04-26
Supplement: s1 [file s1]

**Structural elucidation of glycosaminoglycans in  
the tissue of flounder and isolation of chondroitin  
sulfate C**

**Table S1.** Linear equation of GAGs disaccharide standard curve.

| Disaccharide standard | Linear equation | R2     |
|-----------------------|-----------------|--------|
| HS-TriS               | $y = 9.5585x$   | 0.9753 |
| CS-TriS               | $y = 0.9016x$   | 0.9907 |
| HS-NS6S               | $y = 42.926x$   | 0.9937 |
| HS-NS2S               | $y = 112.19x$   | 0.9948 |
| SB (CS-2S4S)          | $y = 39.653x$   | 0.9937 |
| SD (CS-2S6S)          | $y = 33.43x$    | 0.9913 |
| SE (CS-4S6S)          | $y = 48.926x$   | 0.9972 |
| HS-NS                 | $y = 85.517x$   | 0.9957 |
| HS-6S                 | $y = 86.865x$   | 0.9948 |
| CS-4S                 | $y = 81.856x$   | 0.9942 |
| CS-6S                 | $y = 118.71x$   | 0.9960 |
| HS-2S                 | $y = 38.668x$   | 0.9927 |
| CS-2S                 | $y = 40.087x$   | 0.9990 |
| HS-0S                 | $y = 325.6x$    | 0.9994 |
| HA-0S                 | $y = 96.466x$   | 0.9993 |
| CS-0S                 | $y = 279.18x$   | 0.9997 |

**Table S2.** Average quantity of GAG derived from flounders.

|                                     |    | Bone     | Muscle | Skin   | Viscera | total amount |
|-------------------------------------|----|----------|--------|--------|---------|--------------|
| average<br>quantity of<br>CS (µg/g) | SM | 11917.76 | 146.88 | 543.88 | 260.05  | 12868.57     |
|                                     | P  | 2435.40  | 72.04  | 711.91 | 236.45  | 3455.80      |
|                                     | G  | 2101.92  | 151.87 | 478.97 | -       | 2732.77      |
|                                     | LF | 2470.63  | 150.20 | 423.77 | 198.15  | 3242.75      |
|                                     | PB | 9607.09  | 124.17 | 854.51 | 89.80   | 10675.57     |
|                                     | PC | 1379.91  | 64.29  | 230.01 | 89.44   | 1763.65      |
|                                     | CH | 1387.12  | 50.72  | 138.59 | 212.37  | 1788.80      |
| average<br>quantity of<br>HS (µg/g) | SM | 25.35    | 47.61  | 20.34  | 152.77  | 246.07       |
|                                     | P  | 8.22     | 24.65  | 40.61  | 102.71  | 176.20       |
|                                     | G  | 9.69     | 24.26  | 16.23  | -       | 50.18        |
|                                     | LF | 19.29    | 19.26  | 18.15  | 77.29   | 133.99       |
|                                     | PB | 6.14     | 41.35  | 18.63  | 65.12   | 131.24       |
|                                     | PC | 2.25     | 17.29  | 11.52  | 73.28   | 104.36       |
|                                     | CH | 9.50     | 31.27  | 9.92   | 138.07  | 188.76       |
| average<br>quantity of<br>HA (µg/g) | SM | 539.60   | 38.54  | 593.58 | 140.96  | 1312.68      |
|                                     | P  | 204.47   | 15.69  | 434.21 | 46.52   | 700.90       |
|                                     | G  | 1012.31  | 199.35 | 927.24 | -       | 2138.89      |
|                                     | LF | 220.28   | 34.29  | 34.53  | 178.82  | 467.92       |

---

|    |        |       |        |       |        |
|----|--------|-------|--------|-------|--------|
| PB | 176.80 | 24.55 | 308.55 | 18.21 | 528.10 |
| PC | 89.70  | 20.52 | 106.01 | 18.73 | 234.96 |
| CH | 54.27  | 8.13  | 10.51  | 49.01 | 121.93 |

---

**Table S3.** Percentage of CS disaccharide compositions.

| Percentage |     | CS-0S  | CS-2S | CS-4S  | CS-6S  | SB    | SD    | SE    |
|------------|-----|--------|-------|--------|--------|-------|-------|-------|
| Bone       | SMB | 17.15% | 0.14% | 30.12% | 52.16% | 0.15% | 0.14% | 0.13% |
|            | PB  | 10.51% | 0.21% | 46.56% | 41.82% | 0.22% | 0.44% | 0.25% |
|            | GB  | 14.25% | 0.53% | 29.43% | 54.50% | 0.83% | 0.29% | 0.16% |
|            | LFB | 10.32% | 0.48% | 37.17% | 50.83% | 0.61% | 0.34% | 0.24% |
|            | PBB | 12.95% | 0.31% | 25.32% | 61.20% | 0.03% | 0.12% | 0.07% |
|            | PCB | 17.34% | 0.18% | 27.49% | 54.57% | 0.03% | 0.27% | 0.11% |
|            | CHB | 12.42% | 0.25% | 46.70% | 39.17% | 0.16% | 0.61% | 0.70% |
| Muscle     | SMM | 2.79%  | 0.15% | 85.23% | 2.37%  | 7.95% | 0.56% | 0.94% |
|            | PM  | 7.47%  | 0.27% | 67.90% | 8.22%  | 9.95% | 0.00% | 6.19% |
|            | GM  | 25.61% | 0.09% | 56.16% | 8.20%  | 9.07% | 0.77% | 0.09% |
|            | LFM | 11.94% | 0.08% | 44.97% | 37.68% | 3.18% | 0.48% | 1.68% |
|            | PBM | 12.41% | 0.10% | 53.07% | 27.64% | 5.51% | 0.46% | 0.81% |
|            | PCM | 20.72% | 0.44% | 61.40% | 9.95%  | 5.26% | 0.83% | 1.39% |
|            | CHM | 18.11% | 0.02% | 57.25% | 16.25% | 5.15% | 1.27% | 1.95% |
| Skin       | SMS | 28.09% | 0.31% | 61.53% | 1.87%  | 7.87% | 0.25% | 0.07% |
|            | PS  | 51.48% | 0.08% | 39.57% | 2.83%  | 5.03% | 0.20% | 0.81% |
|            | GS  | 25.61% | 0.09% | 56.16% | 8.20%  | 9.07% | 0.77% | 0.09% |
|            | LFS | 11.94% | 0.08% | 44.97% | 37.68% | 3.18% | 0.48% | 1.68% |
|            | PBS | 12.41% | 0.10% | 53.07% | 27.64% | 5.51% | 0.46% | 0.81% |
|            | PCS | 20.72% | 0.44% | 61.40% | 9.95%  | 5.26% | 0.83% | 1.39% |

|         |     |        |       |        |        |       |       |        |
|---------|-----|--------|-------|--------|--------|-------|-------|--------|
|         | CHS | 18.11% | 0.02% | 57.25% | 16.25% | 5.15% | 1.27% | 1.95%  |
|         | SMV | 8.43%  | 0.25% | 79.80% | 1.60%  | 5.59% | 0.18% | 4.15%  |
|         | PV  | 6.58%  | 0.16% | 66.83% | 9.11%  | 9.41% | 0.00% | 7.90%  |
|         | GV  | -      | -     | -      | -      | -     | -     | -      |
| Viscera | LFV | 16.08% | 0.33% | 57.76% | 7.57%  | 6.60% | 0.41% | 11.24% |
|         | PBV | 13.26% | 0.47% | 68.95% | 7.14%  | 5.38% | 1.09% | 3.70%  |
|         | PCV | 14.64% | 0.22% | 64.70% | 10.47% | 5.93% | 0.99% | 3.04%  |
|         | CHY | 19.73% | 0.16% | 58.00% | 10.88% | 4.68% | 0.31% | 6.24%  |

**Table S4.** Percentage of HS disaccharide compositions.

| Percentage |     | HS-0S  | HS-2S | HS-6S | HS-NS  | HS-NS6S | HS-NS2S | HS-TriS |
|------------|-----|--------|-------|-------|--------|---------|---------|---------|
| Bone       | SMB | 56.92% | -     | 3.99% | 14.60% | 11.29%  | 11.44%  | 1.77%   |
|            | PB  | 74.16% | -     | 2.09% | 9.55%  | 9.50%   | 4.70%   | -       |
|            | GB  | 48.80% | -     | 3.30% | 17.60% | 16.44%  | 12.64%  | 1.23%   |
|            | LFB | 47.37% | -     | 4.77% | 19.13% | 16.09%  | 11.26%  | 1.38%   |
|            | PBB | 69.46% | -     | 0.43% | 14.32% | 6.29%   | 9.64%   | -       |
|            | PCB | 38.40% | 0.18% | 5.57% | 20.99% | 18.41%  | 16.58%  | -       |
|            | CHB | 71.40% | 3.44% | 2.69% | 10.73% | 6.19%   | 5.56%   | -       |
| Muscle     | SMM | 54.21% | 0.63% | 6.95% | 17.54% | 7.64%   | 10.07%  | 2.95%   |
|            | PM  | 36.31% | 0.28% | 6.55% | 18.69% | 16.70%  | 17.37%  | 4.25%   |
|            | GM  | 41.64% | 0.08% | 7.30% | 16.00% | 17.06%  | 12.66%  | 5.25%   |
|            | LFM | 36.95% | 0.12% | 4.75% | 17.02% | 18.13%  | 14.66%  | 8.41%   |
|            | PBM | 48.82% | 0.16% | 5.45% | 15.89% | 10.51%  | 14.38%  | 4.86%   |
|            | PCM | 38.40% | 0.18% | 5.57% | 20.99% | 18.41%  | 16.58%  | -       |
|            | CHM | 40.53% | 0.30% | 7.62% | 18.53% | 15.94%  | 13.59%  | 3.49%   |
| Skin       | SMS | 57.92% | 0.00% | 5.98% | 13.48% | 12.65%  | 9.98%   | 0.00%   |
|            | PS  | 54.88% | 0.59% | 5.35% | 14.21% | 13.86%  | 8.70%   | 2.71%   |
|            | GS  | 51.67% | -     | 9.68% | 12.15% | 15.66%  | 8.16%   | 2.67%   |
|            | LFS | 47.02% | -     | 5.23% | 15.68% | 16.58%  | 8.69%   | 6.79%   |
|            | PBS | 53.45% | -     | 6.42% | 15.29% | 12.92%  | 10.05%  | 1.87%   |

|         |     |        |       |       |        |        |        |        |
|---------|-----|--------|-------|-------|--------|--------|--------|--------|
|         | PCS | 50.27% | -     | 6.53% | 13.10% | 17.81% | 10.41% | 1.87%  |
|         | CHS | 48.84% | -     | 5.35% | 16.92% | 15.53% | 12.59% | 0.77%  |
| Viscera | SMV | 51.51% | 0.32% | 8.30% | 13.26% | 8.81%  | 8.46%  | 9.35%  |
|         | PV  | 39.87% | 0.00% | 9.28% | 17.99% | 16.10% | 10.10% | 6.66%  |
|         | GV  | -      | -     | -     | -      | -      | -      | -      |
|         | LFV | 50.02% | 0.08% | 6.09% | 14.44% | 12.21% | 7.74%  | 9.42%  |
|         | PBV | 49.79% | 0.06% | 9.61% | 14.20% | 14.17% | 6.45%  | 5.71%  |
|         | PCV | 36.19% | 0.24% | 7.91% | 16.21% | 16.03% | 8.30%  | 15.12% |
|         | CHY | 47.13% | 0.27% | 7.75% | 15.54% | 12.09% | 9.62%  | 7.60%  |



**Table S5.** Molecular weight of CS from different sources.

| Source                                     | Code | Mn (kDa) | Mw (kDa) | PDI   |
|--------------------------------------------|------|----------|----------|-------|
| Cartilage (squid)                          | CSE  | 139.5    | 146.40   | 1.05  |
| Cartilage (shark)                          | CSC  | 41.25    | 56.07    | 1.23  |
| Trachea (bovine)                           | CSA  | 46.72    | 48.27    | 1.03  |
|                                            |      | 20.17    | 20.84    | 1.03  |
| Bone<br>(Gray Plaice)                      | GB   | 22.33    | 24.08    | 1.08  |
| Bone<br>( <i>Limanda ferruginea</i> )      | LFB  | 25.07    | 27.76    | 1.11  |
| Bone<br>( <i>Platichthys bicoloratus</i> ) | PBB  | 22.67    | 23.98    | 1.057 |
| Bone<br>( <i>Scophthalmus maximus</i> )    | SMB  | 24.24    | 25.40    | 1.05  |

**Table S6.** Percentage of CS from the flounder bone disaccharide compositions.

| CS Sample | Disaccharide compositions |       |        |        |       |       |       |       |
|-----------|---------------------------|-------|--------|--------|-------|-------|-------|-------|
|           | CS-0S                     | CS-2S | CS-4S  | CS-6S  | SB    | SD    | SE    | 4S/6S |
| CSC       | 1.47%                     | 0.03% | 29.37% | 61.12% | 0.22% | 6.88% | 0.90% | 0.48  |
| SMBCS     | 10.14%                    | 0.05% | 39.22% | 48.47% | 0.25% | 1.71% | 0.15% | 0.81  |
| PBBCS     | 6.22%                     | -     | 34.23% | 57.48% | -     | 2.07% | -     | 0.60  |
| LFBCS     | 8.69%                     | -     | 34.64% | 54.91% | -     | 1.77% | -     | 0.63  |
| GBCS      | 8.74%                     | 0.03% | 23.35% | 65.67% | 0.06% | 2.04% | 0.12% | 0.36  |

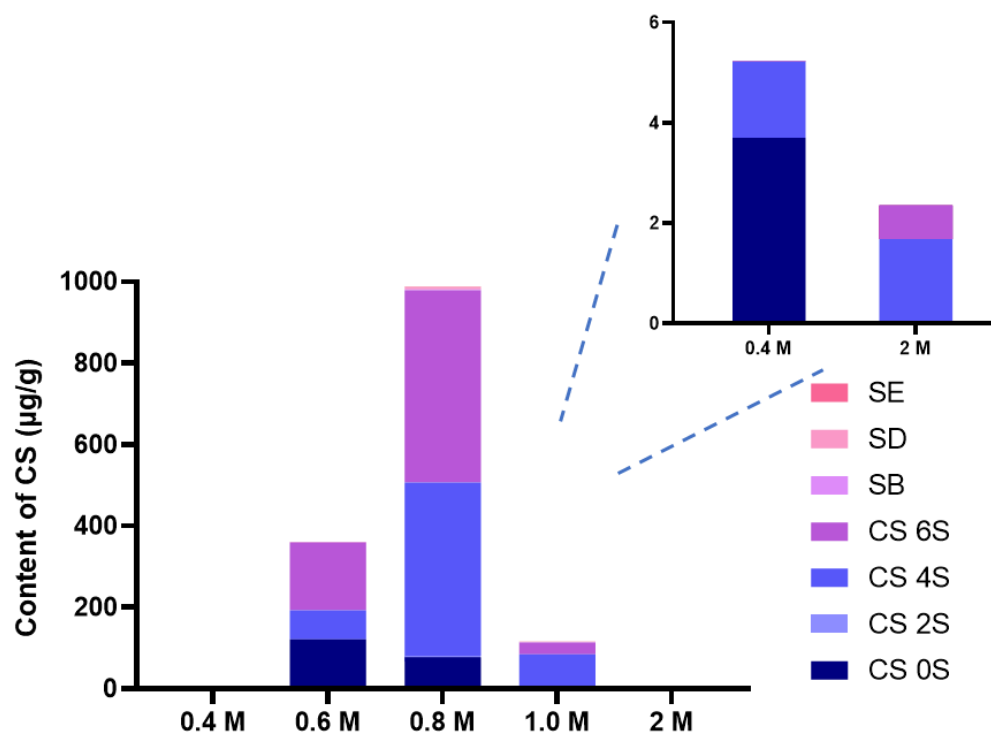

**Figure S1.** Analysis of CS composition and content of polysaccharide eluting components of SMB.

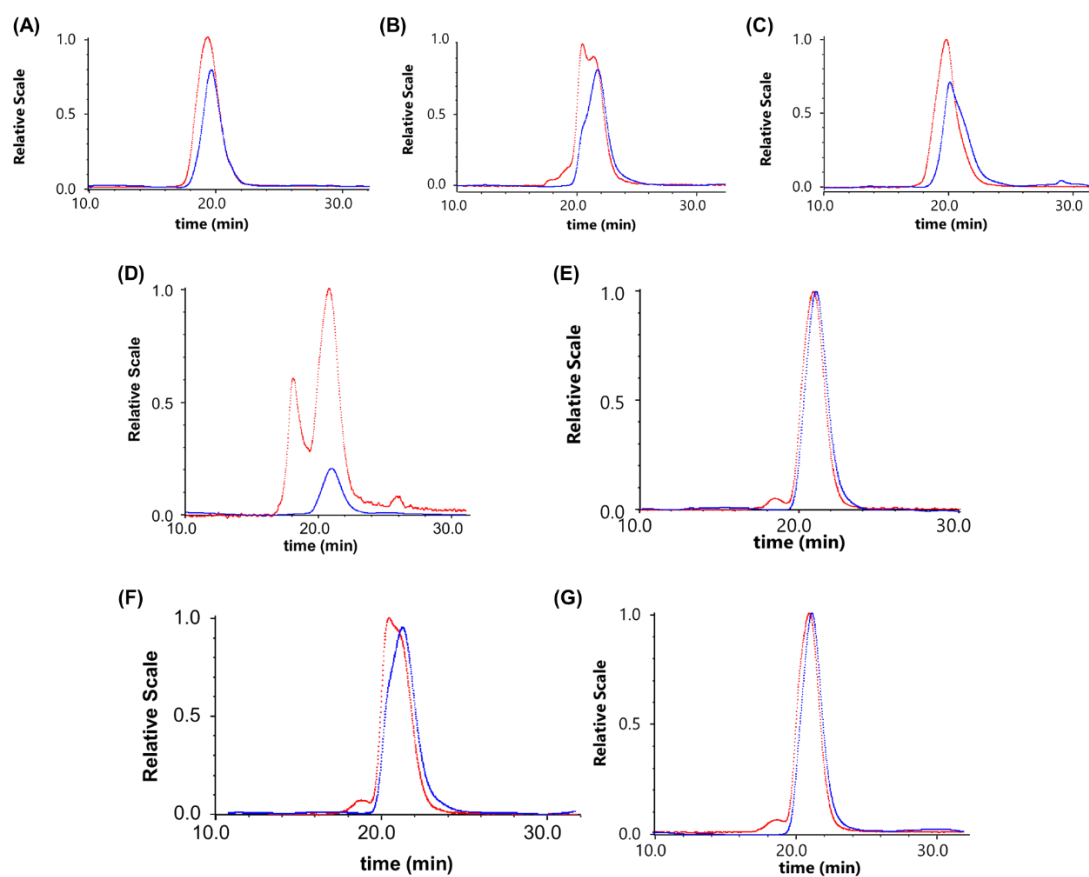

**Figure S2.** HPGPC-MALLS chromatograms of (A) CSE, (B) CSA, (C) CSC, (D) SMBCS, (E)

PBBCS, (F) LFBCS and (G) GBCS.

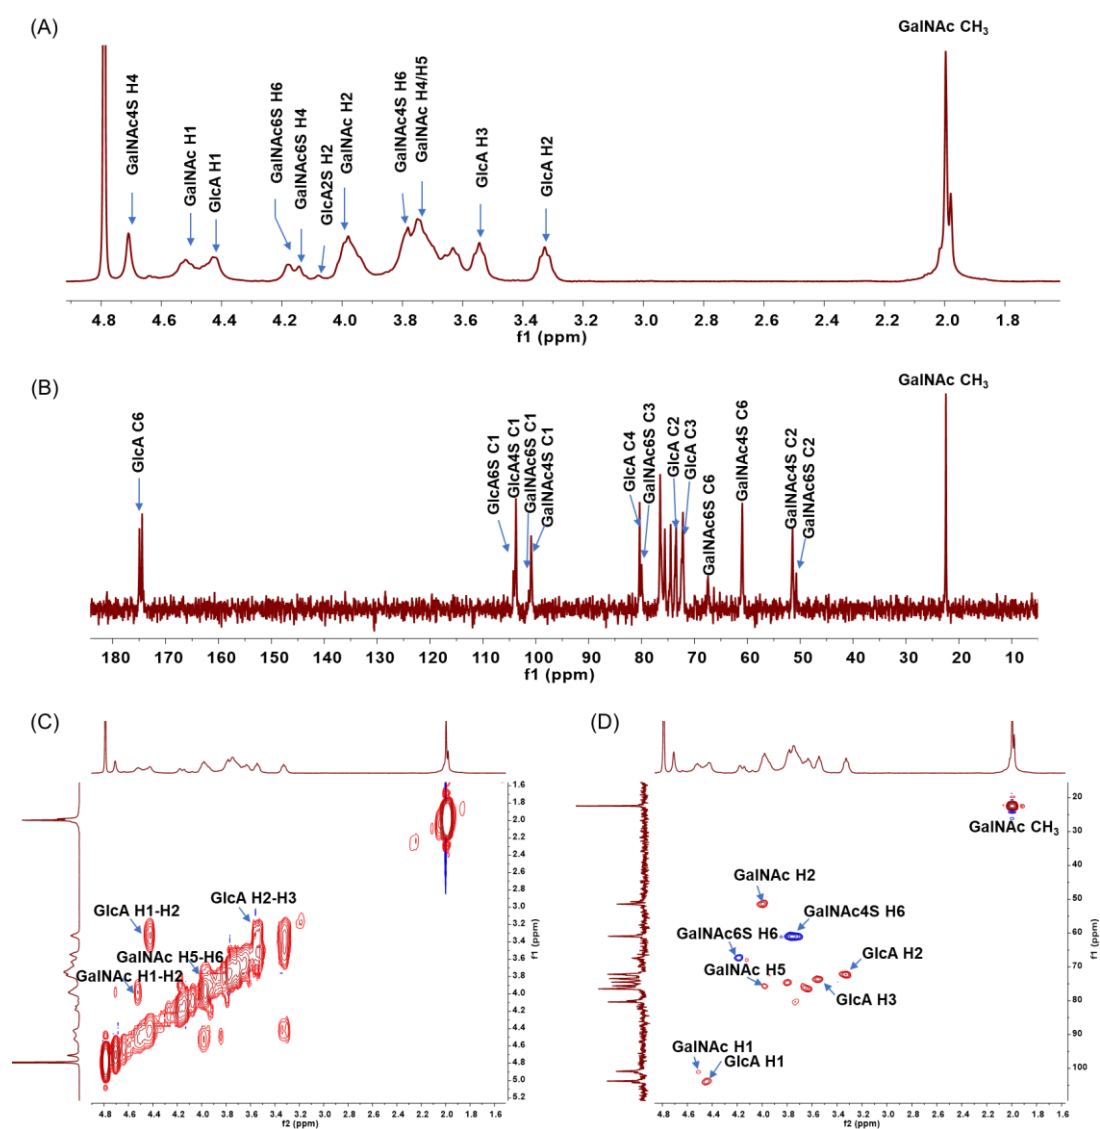

**Figure S3.** (A)  $^1\text{H}$ -NMR, (B)  $^{13}\text{C}$ -NMR, (C)  $^1\text{H}$ - $^1\text{H}$  COSY and (D)  $^1\text{H}$ - $^{13}\text{C}$  HSQC spectroscopy of CSA.

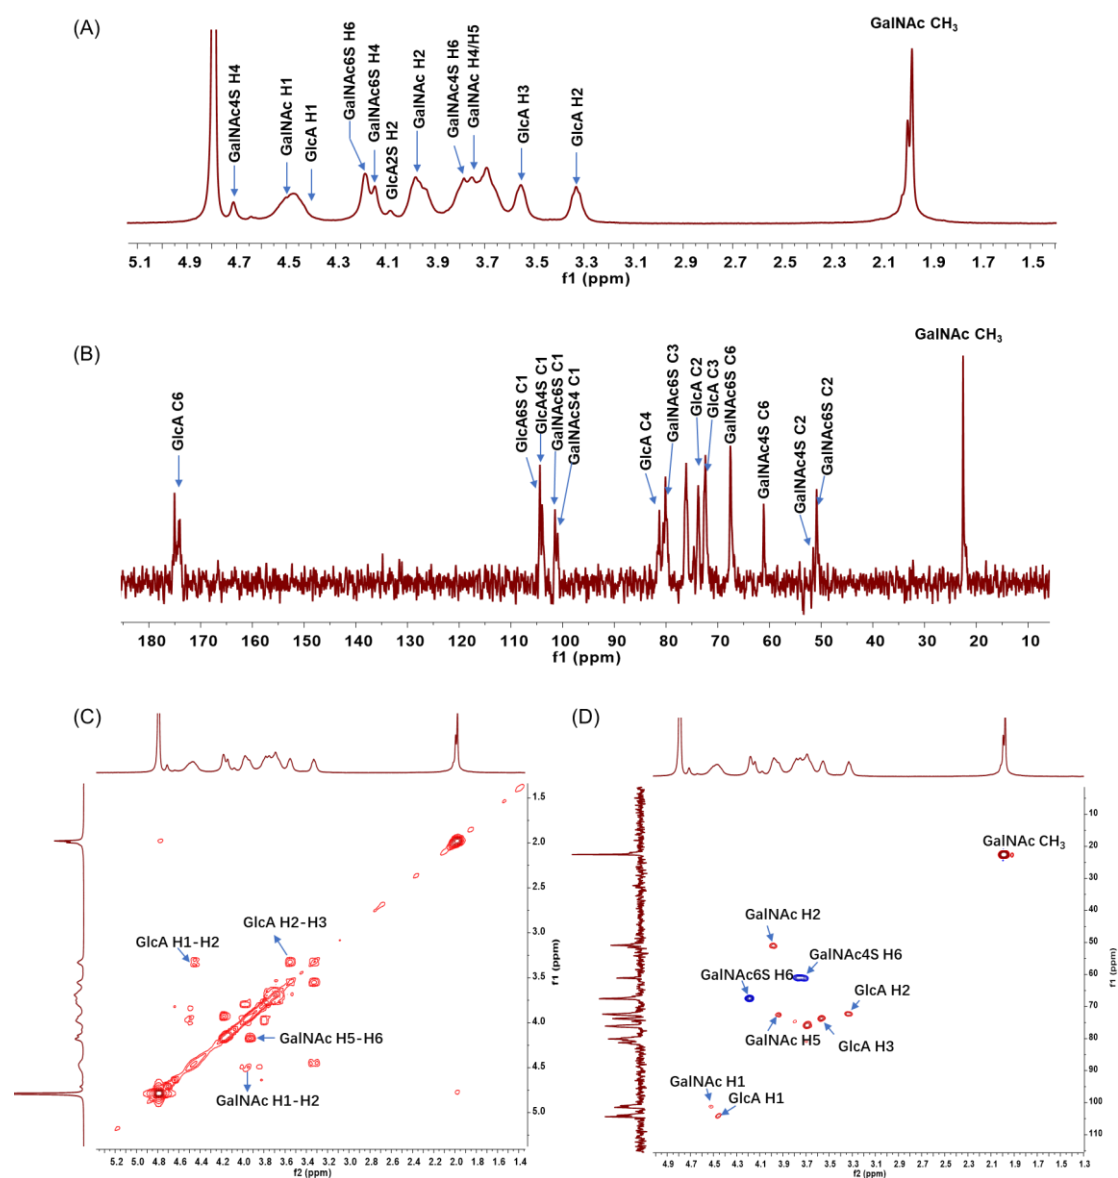

**Figure S4.** (A)  $^1\text{H}$ -NMR, (B)  $^{13}\text{C}$ -NMR, (C)  $^1\text{H}$ - $^1\text{H}$  COSY and (D)  $^1\text{H}$ - $^{13}\text{C}$  HSQC spectroscopy of LFBCS.
